# Supplementary material
Source: PubMed Central journal article supplement (PMC7965407)
Supplement: 3560_table.pdf [file 3560_table.pdf]

**On-line Table: Summary of abnormal brain CT/MRI findings in 30 patients with ATR-X syndrome**

| Case | Exon   | Mutation                | High Signal Intensity on T2WI/FLAIR in WM |                       |                     | GM Abnormality |                     |         | Evaluated Age |
|------|--------|-------------------------|-------------------------------------------|-----------------------|---------------------|----------------|---------------------|---------|---------------|
|      |        |                         | Peritrigonal Area                         | Widespread, Scattered | Delayed Myelination | Atrophy        | Progressive Atrophy | Others  |               |
| 1    | 5'-UTR | Nucleotide substitution |                                           | +                     |                     |                |                     |         | 1 yr          |
| 2    | 2-5    | Exon 2-5 del            |                                           |                       |                     | +              |                     |         | 5 mo          |
| 3    | 5      | R81fs                   |                                           |                       |                     | +              |                     |         | 20 yr         |
| 4    | 6      | E131fs                  | +                                         |                       | +                   | +              |                     | HCC     | 9 yr          |
| 5    | 8      | c.536A>G                |                                           |                       |                     | +              |                     |         | 13 yr         |
| 6    | 8      | c.536A>G                | +                                         |                       |                     |                |                     | HCC     | 3 yr          |
| 7    | 8      | P190L                   |                                           |                       |                     | +              |                     |         | 5 yr          |
| 8    | 8      | V194I                   |                                           |                       |                     | +              |                     |         | 11 yr         |
| 9    | 8      | V194A                   |                                           |                       |                     | +              |                     |         | 21 yr         |
| 10   | 8      | P190L                   | +                                         |                       | +                   |                |                     | HCC     | 8 yr          |
| 11   | 10     | C223F                   | +                                         |                       |                     |                |                     |         | 9 yr          |
| 12   | 10     | L229F                   |                                           |                       |                     | +              |                     |         | 21 yr         |
| 13   | 10     | L245P                   |                                           |                       |                     | +              |                     |         | 7 yr          |
| 14   | 10     | R246C                   |                                           |                       |                     | +              |                     |         | 26 yr         |
| 15   | 10     | R246C                   | +                                         |                       |                     | +              |                     |         | 11 yr         |
| 16   | 10     | Y266C                   |                                           |                       |                     | +              |                     |         | 15 yr         |
| 17   | 10     | R246C                   |                                           |                       |                     | +              |                     |         | 14 yr         |
| 18   | 10     | T278P                   |                                           |                       |                     | +              |                     |         | 54 yr         |
| 19   | 10     | Ser576X                 | +                                         |                       |                     |                |                     |         | 35 mo         |
| 20   | 18     | 1 a.a. del.             | +                                         |                       | +                   | +              |                     |         | 16 mo         |
| 21   | 19     | A1622V                  | +                                         |                       |                     |                |                     |         | 35 mo         |
| 22   | 19     | V1624M                  | +                                         |                       |                     |                |                     | CVA     | 4 yr          |
| 23   | 19     | L1645S                  |                                           |                       |                     | +              |                     |         | 31 mo         |
| 24   | 29     | R2085C                  | +                                         |                       |                     |                |                     |         | 21 mo         |
| 25   | 31     | M2171V                  | +                                         |                       |                     | +              |                     | VE, HCC | 5 yr          |
| 26   | 35     | R7386X                  |                                           |                       | +                   |                |                     |         | 4 mo          |
| 27   | Int 35 | 43 a.a. del             |                                           |                       |                     |                | +                   | VE      | 6-34 mo       |
|      |        |                         | 11                                        | 1                     | 4                   | 17             | 1                   |         |               |

**Note:**—HCC indicates hypoplasia of the corpus callosum; CVA, cerebellar vermis atrophy; UTR, untranslated region; VE, ventricular enlargement; +, present.
